# Supplementary material for: Improvement in the assessment of direct and facilitated ion transfers by electrochemically induced redox transformations of common molecular probes
Source: Royal Society of Chemistry journal article supplement (doi:10.1039/c2cp23184k), 2011-12-16
Supplement: c2cp23184k.pdf [file c2cp23184k.pdf]

## SUPPORTING INFORMATION

### Improvement of assessing direct and facilitated ion transfers by electrochemically induced redox transformations of common molecular probes

Min Zhou,<sup>a</sup> Shiyu Gan,<sup>ab</sup> Lijie Zhong,<sup>a</sup> Xiandui Dong,<sup>a</sup> Jens Ulstrup,<sup>b</sup> Dongxue

Han,<sup>a\*</sup> and Li Niu<sup>ab\*</sup>

<sup>a</sup> Engineering Laboratory for Modern Analytical Techniques, c/o State Key Laboratory of Electroanalytical Chemistry, Changchun Institute of Applied Chemistry and Graduate University of the Chinese Academy of Sciences, Chinese Academy of Sciences, Changchun 130022, P. R. China

<sup>b</sup> Department of Chemistry and NanoDTU, Technical University of Denmark, DK-2800 Kgs, Lyngby, Denmark

E-mail: lniu@ciac.jl.cn, dxhan@ciac.jl.cn or lniu@kemi.dtu.dk (L. Niu).

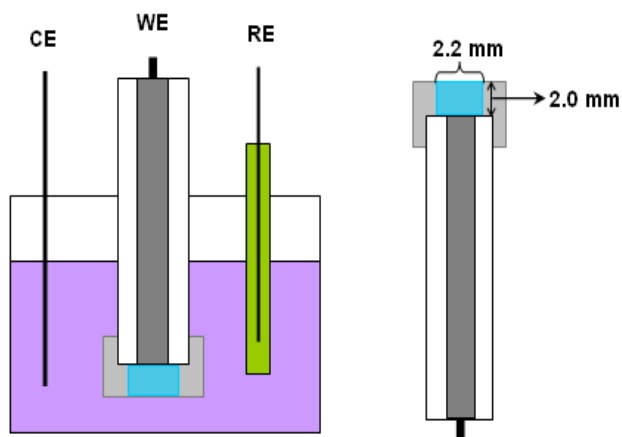

**Fig. S1** A special design used for the measurement of ion transfer.

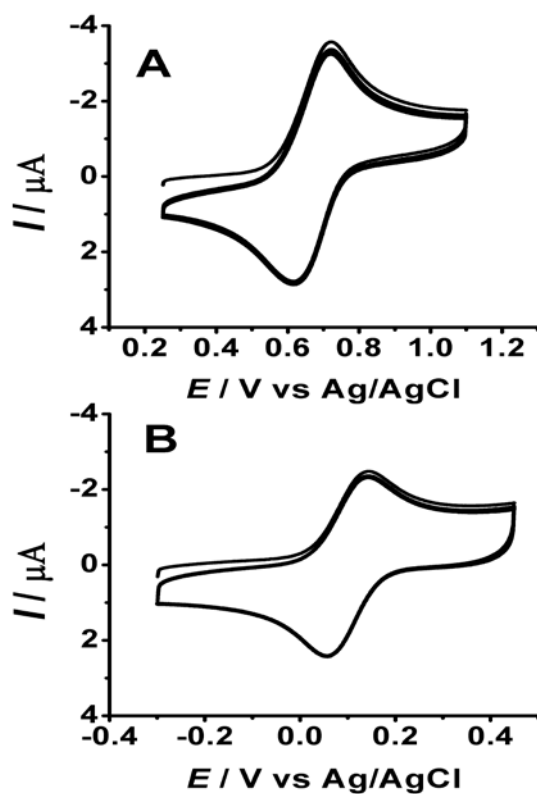

**Fig. S2** 20 consecutive cycling of CV at a constant sweep rate ( $0.5 \text{ V s}^{-1}$ ) using Fc (A) and DMFc (B) as the redox probes and 0.1 M NaCl in Cell (1).

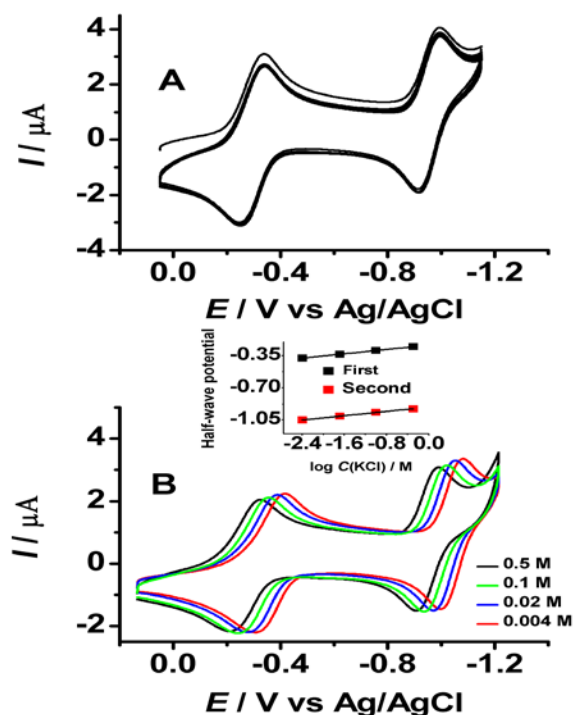

**Fig. S3** (A) 20 consecutive cycling of CV at a constant sweep rate ( $0.5 \text{ V s}^{-1}$ ) based on Cell (2) when the aqueous solution contained  $0.1 \text{ M KCl}$ . (B) CVs measured at a constant sweep rate ( $0.5 \text{ V s}^{-1}$ ) on increasing the concentration of KCl based on Cell (2). Insets are the corresponding plots of the half-wave potentials of two reductions versus the concentrations of KCl.

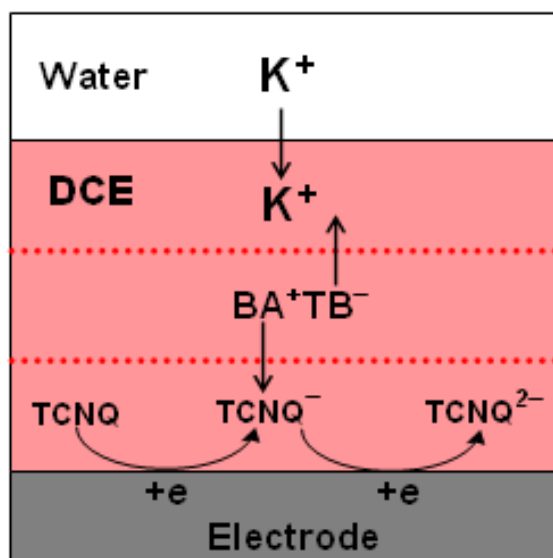

**Fig. S4** Schematic view of direct transfer of  $\text{K}^+$  accompanied by reductions of TCNQ.
